# Supplementary material for: Cost-effectiveness of strategies to increase screening coverage for cervical cancer in Spain: the CRIVERVA study
Source: PubMed Central journal article supplement (PMC5309977; doi:10.1186/s12889-017-4115-0), 2017-02-14
Supplement: 12889_2017_4115_MOESM1_ESM.pdf [file 12889_2017_4115_MOESM1_ESM.pdf]

### CRICERVA STUDY QUESTIONNAIRE

1. Did not attend the first visit
2. Nationality
3. Pathological antecedents
  - None
  - Hysterectomy
  - Uterine cancer
  - Cervical cancer
  - Other
  - Don't know /don't answer
4. Have you ever had a Pap smear? If yes, how often?
  - Never
  - Every year
  - Every 2 years
  - Every 3 years
  - Every 4 years
  - Every 5 years or more
  - I don't know / I do not wish to answer
5. If you had your last cytology test more than three years ago, what was the reason?
  - I did not like it
  - I'm afraid
  - I didn't think it was not important
  - I did not know that it was necessary
6. Where was the cytology performed?
  - Public health system
  - Private sector
  - Mixed (public and private)
  - I don't know / I do not wish to answer
7. Have you ever had a previous HPV test?
  - Yes
  - No
  - I don't know / I do not wish to answer
8. Are you in a relationship?
  - Yes
  - No
  - I don't know / I do not wish to answer
9. Number of children \_\_\_\_\_.
10. Number of caregivers \_\_\_\_\_.
11. What is your highest level of education?
  - I have no formal education
  - Primary, incomplete
  - Primary
  - Secondary
  - Tertiary education (university)
  - I don't know / I do not wish to answer
12. What is your current employment situation?
  - Employed
  - Domestic worker
  - Student
  - On sick leave
  - Provisional disability
  - Retired
  - I don't know / I do not wish to answer
13. Monthly income of the woman
  - 0€ to 600€
  - 601€ to 1000€
  - 1001€ to 2000€
  - More than 2000€
  - I don't know / I do not wish to answer
14. Monthly income of the family
  - 0€ to 600€
  - 601€ to 1000€
  - 1001€ to 2000€
  - More than 2000€
  - I don't know / I do not wish to answer
